# Supplementary material for: A novel highly fluorescent S, N, O co-doped carbon dots for biosensing and bioimaging of copper ions in live cells
Source: PubMed Central journal article supplement — RSC Adv. 2018 Dec 18;8(73):42246–52. doi: 10.1039/c8ra09298b (PMC9092139; doi:10.1039/c8ra09298b), 2018-12-18
Supplement: RA-008-C8RA09298B-s001.pdf [file RA-008-C8RA09298B-s001.pdf]

## Electronic Supplementary Information (ESI)

### **A novel high-fluorescent S, N, O co-doped carbon dots for biosensing and bioimaging of copper ions in live cells**

Yan-yu Dai,<sup>‡a</sup> Zhi-chao Liu,<sup>‡c</sup> Yun-feng Bai,<sup>\*b</sup> Ze-zhong Chen,<sup>b</sup> Jun Qin<sup>b</sup> and Feng Feng<sup>\*ab</sup>

<sup>a</sup> College of Chemistry and Chemical Engineering, Shanxi University, Taiyuan 030006, P.R. China.

<sup>b</sup> College of Chemistry and Environmental Engineering, Shanxi Datong University, Datong 037009, P. R. China.

<sup>c</sup> Institute for Advanced Study and Department of Chemistry, Nanchang University, Nanchang 330031, P. R. China.

\*Corresponding author. Tel: +86-352-7158662; Fax: +86-352-6100028; E-mail: feng-feng64@263.net

‡ These authors contributed equally to this work.

**Fig. S1.** Plots of integrated fluorescence intensity against absorbance of Rhodamine 6G, S, N, O-CDs and undoped CDs at 460 nm.

**Fig. S2.** (A) XPS survey spectrum of S, N, O-CDs. (B) High resolution XPS survey spectrum of C 1s. (C) High resolution XPS survey spectrum of N 1s. (D) High resolution XPS survey spectrum of O 1s.

**Fig. S3.** FT-IR spectrum of S, N, O-CDs.

**Fig. S4.** The fluorescence quenching of S, N, O-CDs after addition of 100  $\mu\text{M}$   $\text{Cu}^{2+}$  for different times.

**Fig. S5.** UV-Vis spectra of m-PD,  $\text{Cu}^{2+}$ , S, N, O-CDs and the mixture of S, N, O-CDs and  $\text{Cu}^{2+}$  (S, N, O-CDs/ $\text{Cu}^{2+}$ ).

**Fig. S6.** Fluorescence response of S, N, O-CDs towards common anion.

**Fig. S7.** Comparison of S, N, O-CDs after adding various amino acids.

**Fig. S8.** Cytotoxicity testing results of S, N, O-CDs on Hela cells viability. The values represent percentage cell viability (mean%  $\pm$ SD, n=6).

**Fig. S9.** The fluorescence of mixture of S, N, O-CDs and 100  $\mu\text{M}$   $\text{Cu}^{2+}$  after addition of 200  $\mu\text{M}$  PPI for different times.

**Fig. S10.** Fluorescence response of S, N, O-CDs towards different potential interferences in the presence of 100  $\mu\text{M}$   $\text{Cu}^{2+}$ . The concentrations of PPI and potential interferences were 200  $\mu\text{M}$  and 0.1 M, respectively.  $F_0$  and  $F$  represent the fluorescence of S, N, O-CDs in the absence of PPI and in the presence of PPI or potential interferences.

**Fig. S11.** The fluorescence of mixture of S, N, O-CDs, 100  $\mu\text{M}$   $\text{Cu}^{2+}$  and 200  $\mu\text{M}$  PPI after addition of 160 U/L ALP for different times.

**Fig. S12.** Fluorescence response of S, N, O-CDs towards different potential interferences in the presence of 100  $\mu\text{M}$   $\text{Cu}^{2+}$  and 200  $\mu\text{M}$  PPI. The concentrations of ALP or potential interferences was 160 U/L, respectively.  $F_0$  and  $F$  represent the fluorescence of S, N, O-CDs in the absence of ALP and in the presence of ALP or potential interferences.

**Table S1.** Comparison of fluorescence quantum yield of different carbon dots.

**Table S2.** Comparison of limit detection of CDs-based  $\text{Cu}^{2+}$  probes.

**Table S3.** Detection of PPI and ALP in human urine samples or serum samples.

**Fluorescence Quantum Yield ( $\Phi_s$ ) Measurement:** Rhodamine 6G is chosen as a standard (Photochemistry and photobiology, 1969, 9: 439-444). The optical densities were measured on a Lambda 35 UV-vis spectrometer spectrophotometer. Absolute values are calculated using the standard reference sample that has a fixed and known fluorescence quantum yield value, according to the following equation:

$$\Phi_X = \Phi_{ST} (M_X/M_{ST})(\eta_X/\eta_{ST})^2$$

Where the subscripts ST and X denote standard and determinand samples respectively,  $\Phi$  is the quantum yield, M is the gradient of integrated fluorescence vs. absorbance, and  $\eta$  is the refractive indices of the solvents.

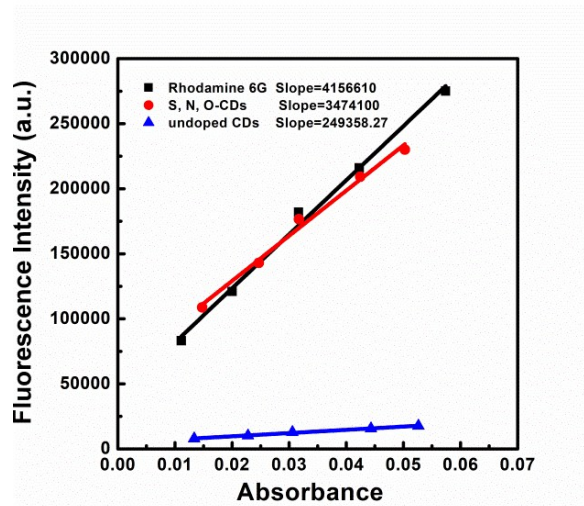

**Fig. S1.** Plots of integrated fluorescence intensity against absorbance of Rhodamine 6G, S, N, O-CDs and undoped CDs at 460 nm.

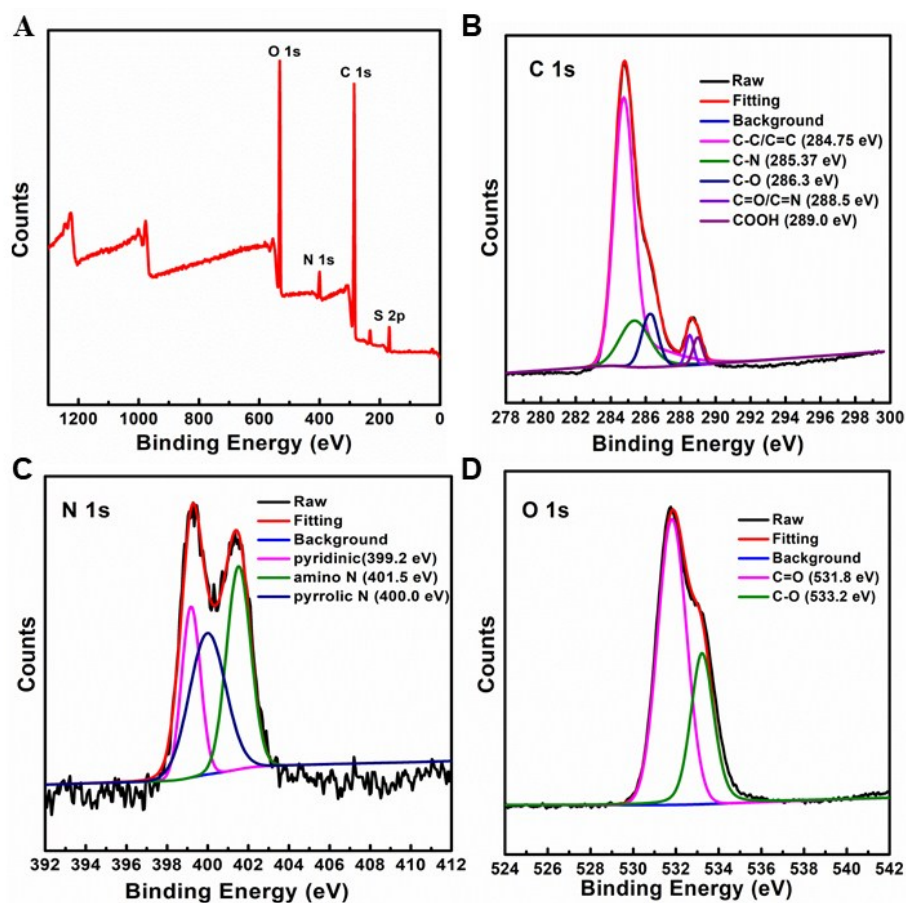

**Fig. S2.** (A) XPS survey spectrum of S, N, O-CDs. (B) High resolution XPS survey spectrum of C 1s. (C) High resolution XPS survey spectrum of N 1s. (D) High resolution XPS survey spectrum of O 1s.

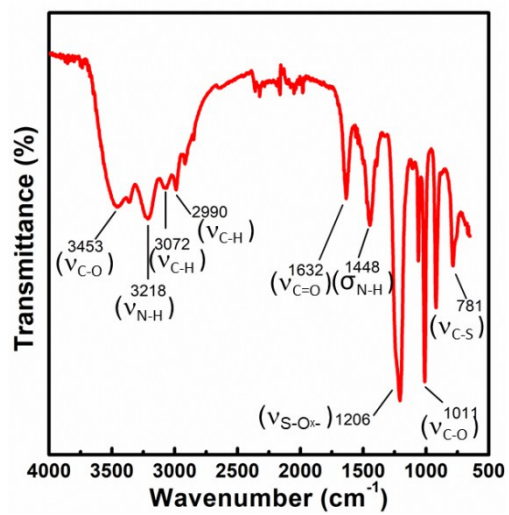

**Fig. S3.** FT-IR spectrum of S, N, O-CDs.

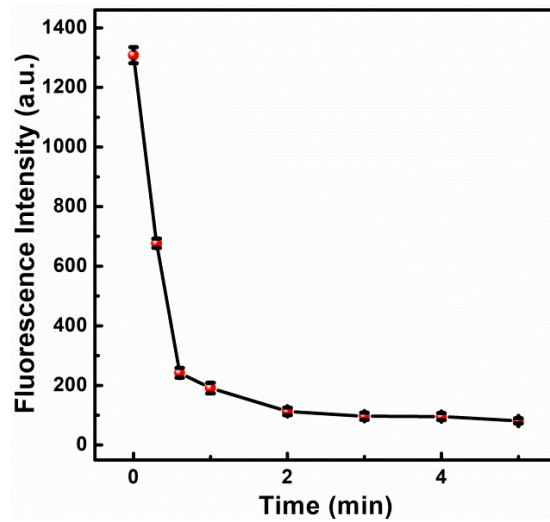

**Fig. S4.** The fluorescence quenching of S, N, O-CDs after addition of 100  $\mu\text{M}$   $\text{Cu}^{2+}$  for different times.

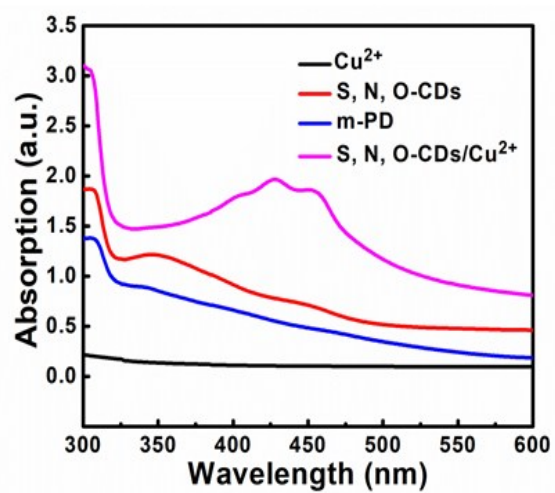

**Fig. S5.** UV-Vis spectra of m-PD,  $\text{Cu}^{2+}$ , S, N, O-CDs and the mixture of S, N, O-CDs and  $\text{Cu}^{2+}$  (S, N, O-CDs/ $\text{Cu}^{2+}$ ).



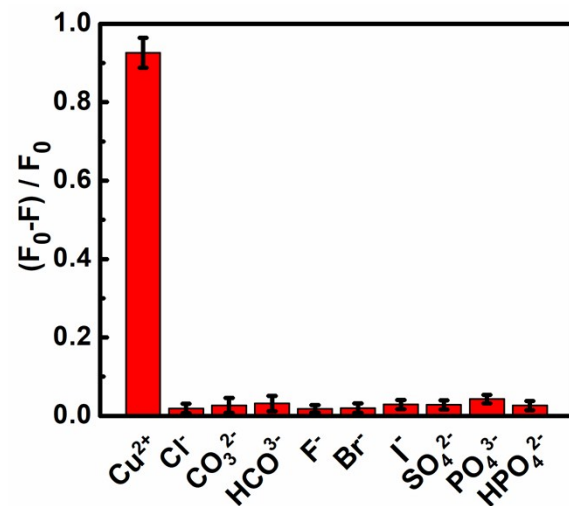

**Fig. S6.** Fluorescence response of S, N, O-CDs towards common anions.

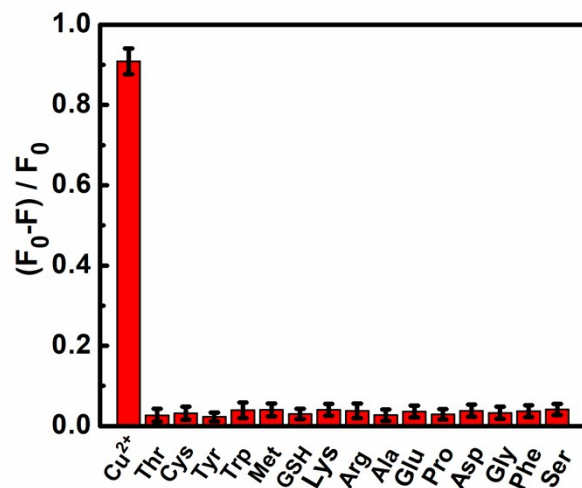

**Fig. S7.** Comparison of S, N, O-CDs after adding various amino acids.

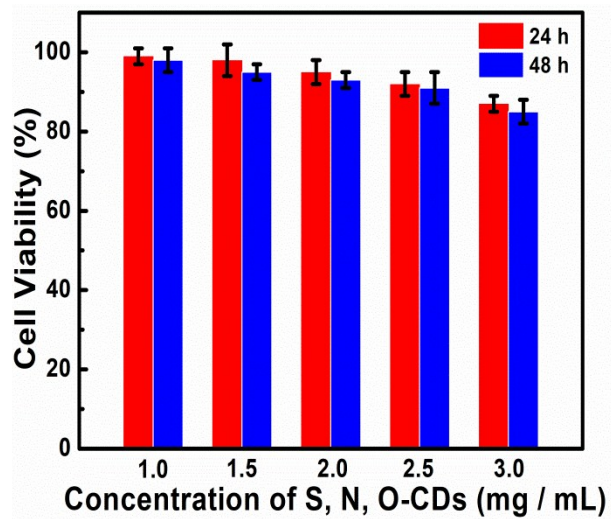

**Fig. S8.** Cytotoxicity testing results of S, N, O-CDs on HeLa cells viability. The values represent percentage cell viability (mean%  $\pm$ SD, n=6).

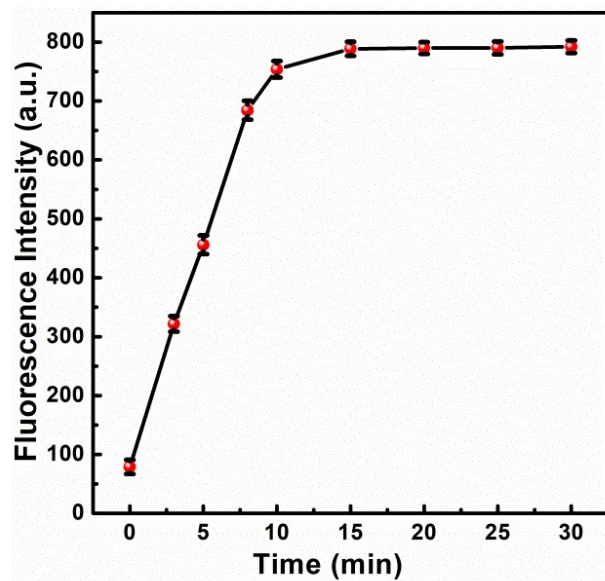

**Fig. S9.** The fluorescence of mixture of S, N, O-CDs and 100  $\mu\text{M}$   $\text{Cu}^{2+}$  after addition of 200  $\mu\text{M}$  PPI for different times.

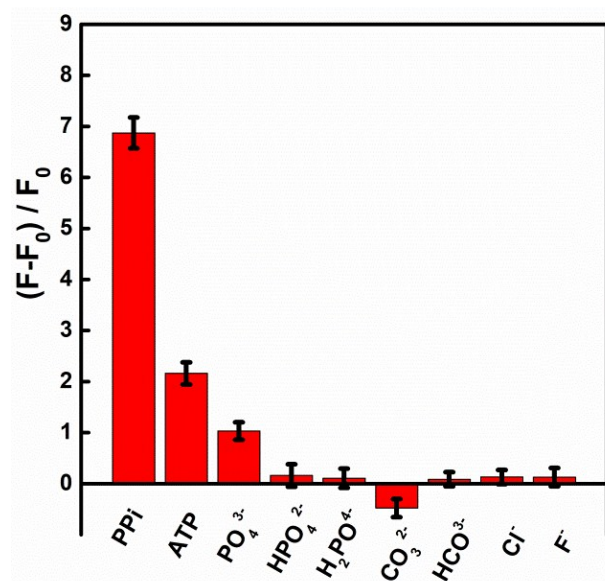

**Fig. S10.** Fluorescence response of S, N, O-CDs towards different potential interferences in the presence of 100  $\mu\text{M}$   $\text{Cu}^{2+}$ . The concentrations of PPI and potential interferences were 200  $\mu\text{M}$  and 0.1 M, respectively.  $F_0$  and  $F$  represent the fluorescence of S, N, O-CDs in the absence of PPI and in the presence of PPI or potential interferences.

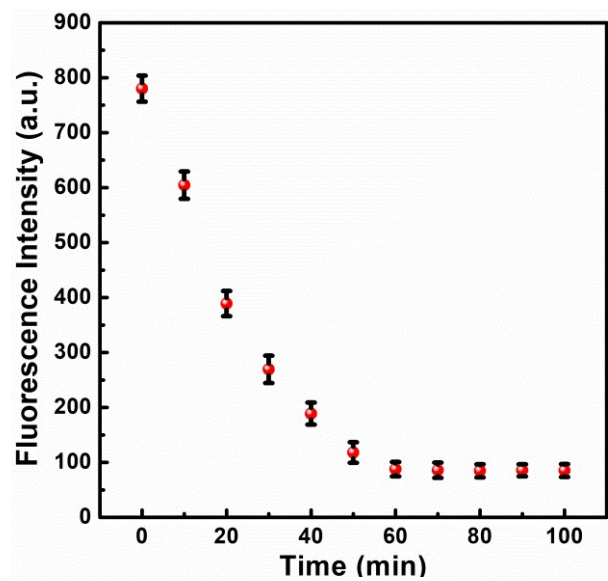

**Fig. S11.** The fluorescence of mixture of S, N, O-CDs, 100  $\mu\text{M}$   $\text{Cu}^{2+}$  and 200  $\mu\text{M}$  PPI after addition of 160 U/L ALP for different times.

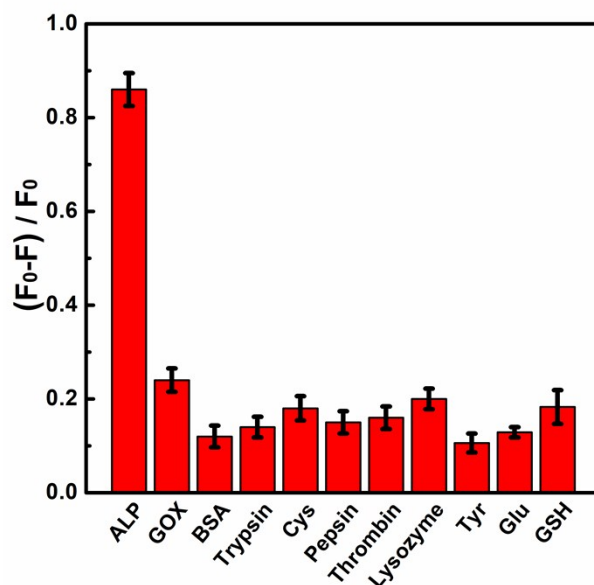

**Fig. S12.** Fluorescence response of S, N, O-CDs towards different potential interferences in the presence of 100  $\mu\text{M}$   $\text{Cu}^{2+}$  and 200  $\mu\text{M}$  PPI. The concentrations of ALP or potential interferences was 160 U/L, respectively.  $F_0$  and  $F$  represent the fluorescence of S, N, O-CDs in the absence of ALP and in the presence of ALP or potential interferences.

**Table S1.** Comparison of fluorescence quantum yield of different carbon dots <sup>a</sup>.

| <b>Carbon dots</b> | <b>Standard Reference</b> | <b>Quantum Yield</b> | <b>Reference</b> |
|--------------------|---------------------------|----------------------|------------------|
| S,N,O codoped      | Quinine Sulfate           | 42.8%                | S1               |
| S,N,O codoped      | Quinine Sulfate           | 21.6%                | S2               |
| N-doped            | Rhodamine 6G              | 18.7%                | S3               |
| S,N,O codoped      | Quinine Sulfate           | 73%                  | S4               |
| N-doped            | Rhodamine B               | 47%                  | S5               |
| S-doped            | Quinine Sulfate           | 5.77%                | S6               |
| S-doped            | Quinine Sulfate           | 21.4%                | S7               |
| S,N,O codoped      | Quinine Sulfate           | 63.8%                | S8               |
| S,N,O codoped      | Rhodamine 6G              | 78.6%                | this work        |

<sup>a</sup> The quantum yields (QY) of quinine sulfate (0.1 M H<sub>2</sub>SO<sub>4</sub>) at 350 nm and 366 nm excitation wavelength are 57.7% and 53%, respectively. Similarly, the QY of Rhodamine 6G in ethanol at 488 nm excitation wavelength is 94%. The QY of Rhodamine B using ethanol as a solvent are 69% and 89% under 365 nm and 495 nm excitation wavelength, respectively.



**Table S2.** Comparison of limit detection of CDs-based Cu<sup>2+</sup> probes.

| <b>Fluorescent carbon dots (CDs)</b>        | <b>Limit of detection</b> | <b>Reference</b> |
|---------------------------------------------|---------------------------|------------------|
| B, N-CDs                                    | 0.3 $\mu$ M               | S9               |
| Calcium phosphate/CDs hybrid composites     | 9.82 $\mu$ M              | S10              |
| CDs                                         | 4.8 $\mu$ M               | S11              |
| CDs                                         | 0.76 $\mu$ M              | S12              |
| CDs/polymeric matrix                        | 0.71 $\mu$ M              | S13              |
| Cyclam-functionalized CDs                   | 0.1 $\mu$ M               | S14              |
| Branched-polyethylenimine (BPEI)-capped CDs | 0.115 $\mu$ M             | S15              |
| S, N, O-CDs                                 | 0.29 $\mu$ M              | this work        |

**Table S3.** Detection of PPI and ALP in human urine samples or serum samples

| Real samples           | Added      | Found          | Recovery (%) | RSD (n=3, %) |
|------------------------|------------|----------------|--------------|--------------|
| Urine samples<br>(PPI) | 20 $\mu$ M | 38.78 $\mu$ M  | 107.84       | 3.12         |
|                        | 40 $\mu$ M | 56.42 $\mu$ M  | 97.28        | 4.44         |
|                        | 80 $\mu$ M | 100.89 $\mu$ M | 104.54       | 5.31         |
| Serum samples<br>(ALP) | 20 U/L     | 18.95 U/L      | 94.73        | 5.13         |
|                        | 60 U/L     | 62.41 U/L      | 104.02       | 4.04         |
|                        | 100 U/L    | 104.72 U/L     | 104.72       | 4.51         |
|                        | 140 U/L    | 147.58 U/L     | 105.40       | 5.03         |

## Reference

- [S1] T. Chatzimitakos, A. Kasouni, L. Sygellou, I. Leonardos, A. Troganis and C. Stalikas, *Sens. Actuators, B*, 2018, **267**, 494-501.
- [S2] W. Wang, Y.C. Lu, H. Huang, A.J. Wang, J.R. Chen and J.J. Feng, *Biosens. Bioelectron.*, 2015, **64**, 517-522.
- [S3] X.Q. Li, Y.H. Zheng, Y.P. Tang, Q. Chen, J.W. Gao, Q. Luo and Q.M. Wang, *Spectrochim. Acta, Part A*, 2019, **206**, 240-245.
- [S4] Y.Q. Dong, H.C. Pang, H.B. Yang, C.X. Guo, J.W. Shao, Y.W. Chi, C.M. Li and T. Yu, *Angew. Chem. Int. Ed.*, 2013, **52**, 7800-7804.
- [S5] M.Y. Li, C. Yu, C. Hu, W.B. Yang, C.T. Zhao, S. Wang, M.D. Zhang, J.Z. Zhao, X.N. Wang and J.S. Qiu, *Chem. Eng. J.*, 2017, **320**, 570-575.
- [S6] V.M. Naik, D.B. Gunjal, A.H. Gore, S.P. Pawar, S.T. Mahanwar, P.V. Anbhule and G.B. Kolekar, *Diamond Relat. Mater.*, 2018, **88**, 262-268.
- [S7] F. Nemati, M. Hosseini, R. Zare-Dorabei, F. Salehnia and M.R. Ganjali, *Sens. Actuators, B*, 2018, **273**, 25-34.
- [S8] S. Liao, X.Y. Zhao, F.W. Zhu, M. Chen, Z.L. Wu, X.Z. Song, H. Yang and X.Q. Chen, *Talanta*, 2018, **180**, 300-308.
- [S9] M. C. Rong, K. X. Zhang, Y. R. Wang and X. Chen, *Chin. Chem. Lett.*, 2017, **28**, 1119-1124.
- [S10] S. Guo, S. Lu, P. X. Xu, Y. Ma, L. Zhao, Y. Zhao, W. Gu and M. Xue, *Dalton Trans.*, 2016, **45**, 7665-7671.
- [S11] X. H. Ma, Y. H. Dong, H. Y. Sun and N. S. Chen, *Mater. Today Chem.*, 2017, **5**, 1-10.

- [S12] V. A. Moreira, W. T. Suarez, M. D. O. K. Franco and F. F. Gambarra Neto, *Anal. Methods*, 2018, **10**, 4570-4578.
- [S13] S. A. R. Shahamirifard, M. Ghaedi, M. Montazerzohori and A. Masoudiasl, *Photochem. Photobiol. Sci.*, 2018, **17**, 245-255.
- [S14] J. Chen, Y. Li, K. Lv, W. B. Zhong, H. Wang, Z. Wu, P. G. Yi and J. H. Jiang, *Sens. Actuators, B*, 2016, **224**, 298-306.
- [S15] Y. S. Liu, Y. N. Zhao and Y. Y. Zhang, *Sens. Actuators, B*, 2014, **196**, 647-652.
